# Supplementary material
Source: ML conference proceedings conference paper supplement (https://proceedings.neurips.cc/paper_files/paper/2014/hash/149e9677a5989fd342ae44213df68868-Abstract.html)

---

# Supplemental Material for

## *Parallel Sampling of HDPs using Sub-Cluster Splits*

---

**Jason Chang**  
 CSAIL, MIT  
 jchang7@csail.mit.edu

**John W. Fisher III**  
 CSAIL, MIT  
 fisher@csail.mit.edu

In the following supplemental material we provide some additional details and derivations for the paper. We begin by showing how to calculate the joint distribution of  $p(\beta, z)$ , marginalizing out  $\pi$ , in Section 1. Then, in Section 2 we consider looking at joint log-likelihoods of HDP topic models and show that the typical set of the distribution is very far from the mode. In Sections 3-4, we give a more detailed calculation of the Hastings ratios. Finally, in Section 5, we visualize the inferred topics from the New York Times Articles.

### 1 Calculating the $p(\beta, z)$ Distribution

We begin by proving Proposition 5.1 in the paper, reproduced here.

**Proposition 1.1.** *Let  $z$  be a set of topic assignments with integer values in  $\{1, \dots, K\}$ . Let  $\beta$  be a  $(K+1)$ -length vector representing global topic weights, and  $\beta_{K+1}$  be the sum of weights associated with empty topics. The prior distribution,  $p(\beta, z)$ , marginalizing over  $\pi$ , can be expressed as*

$$p(\beta, z) = \left[ \gamma \beta_{K+1}^{\gamma-1} \prod_{k=1}^K \beta_k^{-1} \right] \times \left[ \prod_{j=1}^D \frac{\Gamma(\alpha)}{\Gamma(\alpha + n_{j..})} \prod_{k=1}^K \frac{\Gamma(\alpha \beta_k + n_{j..k})}{\Gamma(\alpha \beta_k)} \right]. \quad (1)$$

To calculate the prior distribution,  $p(\beta, z)$ , we will rely heavily on the Chinese Restaurant Franchise (CRF) representation of the HDP given in [1]. Additionally, we change the notation slightly. In [1],  $t$  was used as a particular table index, and  $t_{ji}$  was used as the particular index assigned to customer  $i$  in restaurant  $j$ . This can be confusing, since we often refer to a variable without subscripts as the set of all variables. Instead, we denote  $\tau_{ji}$  as the table assignment for customer  $i$  in restaurant  $j$ , and  $\kappa_{jt}$  as the dish assignment for table  $t$  in restaurant  $j$ . The derivation is outlined in the following steps.

1. Find  $p(\beta, \kappa, \tau, z)$
2. Find  $p(\kappa, \tau | \beta, z)$
3. Combine to find  $p(\beta, z)$

#### 1.1 Deriving the Joint: $p(\beta, \kappa, \tau, z)$

Based on the generative process of the CRF,  $p(\kappa, \tau)$  can be expressed as

$$p(\tau) = \prod_{j=1}^D \text{CRP}(\alpha, n_{j..}) = \prod_{j=1}^D \frac{\Gamma(\alpha) \alpha^{m_{j..}}}{\Gamma(\alpha + n_{j..})} \prod_{t=1}^{m_{j..}} \Gamma(n_{jt..}), \quad (2)$$

$$p(\kappa | \tau) = \text{CRP}(\gamma, m_{..}) = \frac{\Gamma(\gamma) \gamma^K}{\Gamma(\gamma + m_{..})} \prod_{k=1}^K \Gamma(m_{..k}), \quad (3)$$

where  $\text{CRP}(\cdot)$  represents a sample from a Chinese Restaurant Process. These expressions can be combined to form the joint:

$$p(\kappa, \tau) = \left[ \frac{\Gamma(\gamma)\gamma^K}{\Gamma(\gamma+m_{\cdot\cdot})} \prod_{k=1}^K \Gamma(m_{\cdot k}) \right] \cdot \left[ \prod_{j=1}^D \frac{\Gamma(\alpha)\alpha^{m_{j\cdot}}}{\Gamma(\alpha+n_{j\cdot})} \prod_{t=1}^{m_{j\cdot}} \Gamma(n_{jt\cdot}) \right]. \quad (4)$$

We note that  $z$ , which directly assigns a customer to a dish, is a deterministic function conditioned on  $\kappa$  and  $\tau$ . More precisely, it can be expressed as

$$p(z|\kappa, \tau) = \prod_{j=1}^D \prod_{i=1}^{N_j} \mathbb{I}[z_{ji} = \kappa_{j\tau_{ji}}]. \quad (5)$$

Additionally, it is well known that  $p(\beta|m)$  is the following Dirichlet distribution

$$p(\beta|m) = \text{Dir}(\beta_1, \dots, \beta_K, \beta_{K+1}; m_{\cdot 1}, \dots, m_{\cdot K}, \gamma). \quad (6)$$

This can be seen by drawing on the fact that any partitioning of the space in a Dirichlet process results in a Dirichlet distribution. Since  $m$  is a summary statistic of  $k$ , we have

$$p(\beta|\kappa, \tau, z) = p(\beta|m) = \frac{\Gamma(\gamma+m_{\cdot\cdot})\beta_{K+1}^{\gamma-1}}{\Gamma(\gamma)\prod_{k=1}^K \Gamma(m_{\cdot k})} \prod_{k=1}^K \beta_k^{m_{\cdot k}-1} \quad (7)$$

Finally, assuming  $z$  is consistent with  $\kappa$  and  $\tau$  (i.e., Equation (5) evaluates to 1 instead of 0), the entire joint prior of interest can be expressed as

$$\begin{aligned} p(\beta, \kappa, \tau, z) &= \left[ \frac{\Gamma(\gamma)\gamma^K}{\Gamma(\gamma+m_{\cdot\cdot})} \prod_{k=1}^K \Gamma(m_{\cdot k}) \right] \left[ \prod_{j=1}^D \frac{\Gamma(\alpha)\alpha^{m_{j\cdot}}}{\Gamma(\alpha+n_{j\cdot})} \prod_{t=1}^{m_{j\cdot}} \Gamma(n_{jt\cdot}) \right] \left[ \frac{\Gamma(\gamma+m_{\cdot\cdot})\beta_{K+1}^{\gamma-1}}{\Gamma(\gamma)\prod_{k=1}^K \Gamma(m_{\cdot k})} \prod_{k=1}^K \beta_k^{m_{\cdot k}-1} \right] \\ &= \gamma^K \beta_{K+1}^{\gamma-1} \alpha^{m_{\cdot\cdot}} \left[ \prod_{k=1}^K \beta_k^{m_{\cdot k}-1} \right] \left[ \prod_{j=1}^D \frac{\Gamma(\alpha)}{\Gamma(\alpha+n_{j\cdot})} \prod_{t=1}^{m_{j\cdot}} \Gamma(n_{jt\cdot}) \right] \end{aligned} \quad (8)$$

## 1.2 Deriving the Conditional $p(\kappa, \tau|\beta, z)$

We now show how to express  $p(\kappa, \tau|\beta, z)$ . We note that conditioning on  $z$  is equivalent to assigning each customer a particular dish. Thus, we need to calculate the probability of any particular configuration of tables such that each customer gets the correct dish.

Suppose there are three customers with assignments  $z_{11} = 1$ ,  $z_{12} = 2$ , and  $z_{13} = 2$ . While  $x_{11}$  must sit at a different table than  $x_{12}$  and  $x_{13}$  (i.e.,  $\tau_{12} \neq \tau_{11} \neq \tau_{23}$ ), nothing can be said about the relationship between  $\tau_{12}$  and  $\tau_{13}$ . This results from the fact that two customers can be served the same dish at different tables.

An equivalent metaphor for the process conditioned on  $z$  is that a customer comes into a restaurant having been assigned dish  $k$ . The customer then chooses to sit at an occupied table serving dish  $k$  with probability proportional to the number of customers there, or starts a new table that serves dish  $k$  with probability  $\alpha\beta_k$ . This process is equivalent to  $D \times K$  independent CRPs, each with  $n_{j\cdot k}$  customers and  $\alpha\beta_k$  as the concentration parameter. Thus, we can write this easily as

$$p(\kappa, \tau|\beta, z) = \prod_{j=1}^D \prod_{k=1}^K \text{CRP}(\alpha\beta_k, n_{j\cdot k}) \quad (9)$$

$$= \prod_{j=1}^D \prod_{k=1}^K \frac{(\alpha\beta_k)^{m_{jk}} \Gamma(\alpha\beta_k)}{\Gamma(\alpha\beta_k + n_{j\cdot k})} \prod_{t=1}^{m_{jk}} \Gamma(n_{jtk}) \quad (10)$$

$$= \alpha^{m_{\cdot\cdot}} \left[ \prod_{j=1}^D \prod_{k=1}^K \frac{\beta_k^{m_{jk}} \Gamma(\alpha\beta_k)}{\Gamma(\alpha\beta_k + n_{j\cdot k})} \right] \left[ \prod_{j=1}^D \prod_{t=1}^{m_{j\cdot}} \Gamma(n_{jt\cdot}) \right], \quad (11)$$

where we have used the fact that every table only serves one dish to equate the following

$$\prod_{k=1}^K \prod_{t=1}^{m_{jk}} \Gamma(n_{jtk}) = \prod_{t=1}^{m_{j\cdot}} \Gamma(n_{jt\cdot}). \quad (12)$$

### 1.3 Finding the Prior $p(\beta, z)$

We now note the following relationship:

$$p(\beta, \kappa, \tau, z) = p(\beta, z)p(\kappa, \tau|\beta, z). \quad (13)$$

Finding the expression for  $p(\beta, z)$  is as simple as substituting the previously found expressions. Assuming consistency between  $z$  with  $\kappa$  and  $\tau$ , we can ignore the  $p(z|\kappa, \tau)$  term in Equation (5), resulting in

$$p(\beta, z) = \frac{p(\beta, \kappa, \tau, z)}{p(\kappa, \tau|\beta, z)}, \quad (14)$$

$$= \frac{\gamma^K \beta_{K+1}^{\gamma-1} \alpha^{m_{\cdot\cdot}} \left[ \prod_{k=1}^K \beta_k^{m_{\cdot k} - 1} \right] \left[ \prod_{j=1}^D \frac{\Gamma(\alpha)}{\Gamma(\alpha + n_{j\cdot})} \prod_{t=1}^{m_{j\cdot}} \Gamma(n_{jt\cdot}) \right]}{\alpha^{m_{\cdot\cdot}} \left[ \prod_{j=1}^D \prod_{k=1}^K \frac{\Gamma(\alpha\beta_k)}{\Gamma(\alpha\beta_k + n_{j\cdot k})} \beta_k^{m_{jk}} \right] \left[ \prod_{j=1}^D \prod_{t=1}^{m_{j\cdot}} \Gamma(n_{jt\cdot}) \right]}, \quad (15)$$

$$= \frac{\gamma^K \beta_{K+1}^{\gamma-1} \left[ \prod_{k=1}^K \beta_k^{-1} \right] \left[ \prod_{j=1}^D \frac{\Gamma(\alpha)}{\Gamma(\alpha + n_{j\cdot})} \right]}{\prod_{j=1}^D \prod_{k=1}^K \frac{\Gamma(\alpha\beta_k)}{\Gamma(\alpha\beta_k + n_{j\cdot k})}}, \quad (16)$$

$$= \gamma^K \beta_{K+1}^{\gamma-1} \prod_{k=1}^K \beta_k^{-1} \left[ \prod_{j=1}^D \frac{\Gamma(\alpha)}{\Gamma(\alpha + n_{j\cdot})} \prod_{k=1}^K \frac{\Gamma(\alpha\beta_k + n_{j\cdot k})}{\Gamma(\alpha\beta_k)} \right]. \quad (17)$$

This concludes the derivation of finding the expression for  $p(\beta, z)$ .

### 1.4 Notes on $p(\beta, z)$

We highlight a few notes on the derived expression for  $p(\beta, z)$ . At first glance, parts of Equation (17) may seem a bit odd. For example, the  $\beta_k^{-1}$  term seems like an improper prior, and the term inside the square brackets just seems like the product of Dirichlet-Multinomial distributions. We remind the reader that meaning of  $\beta$  in  $p(\beta, z)$  slightly differs from the infinite-length global topic proportions. In particular,  $\beta$  is defined over the partitions imposed by  $z$ . Moreover, because  $z$  takes on exactly  $K$  non-empty partitions,  $\beta_k > 0 \forall k \in \{1, \dots, K\}$ , and  $\beta_k^{-1}$  will never result in division by zero.

The term in the square brackets is very similar to a Dirichlet-Multinomial. A product of  $D$  independent Dirichlet-Multinomial distributions can be expressed as

$$\prod_{j=1}^D \text{Dir-Mult}(z_j; \alpha\beta_1, \dots, \alpha\beta_{K+1}) = \prod_{j=1}^D \frac{\Gamma(\alpha)}{\Gamma(\alpha + n_{j\cdot})} \prod_{k=1}^{K+1} \frac{\Gamma(\alpha\beta_k + n_{j\cdot k})}{\Gamma(\alpha\beta_k)},$$

where we have used the fact that  $\sum_{k=1}^K \alpha\beta_k = \alpha$ . While this expression looks similar to the one in Equation (17), the inner product is over  $K + 1$  terms instead of  $K$ . Another way of viewing the difference is that Equation (17) implicitly assumes that  $n_{j\cdot(K+1)}$  is zero, since  $z$  can only take on  $K$  unique partitions. For this reason, the term inside the square brackets of Equation (17) is not the product of Dirichlet-Multinomials.

Equation (17) cannot be analytically integrated to validate that it has the correct normalization. We know, however, that Equation (11) describing  $p(\kappa, \tau|\beta, z)$  trivially integrates to one by the construction of the independent CRPs. Because  $p(\kappa, \tau|\beta, z)$  is a valid distribution and  $p(\beta, \kappa, \tau, z)/p(\kappa, \tau|\beta, z)$  has no dependence on  $\kappa$  or  $\tau$ , the derived expression for  $p(\beta, z)$  must be a valid distribution, conditioned on  $p(\beta, \kappa, \tau, z)$  being the correct joint distribution.

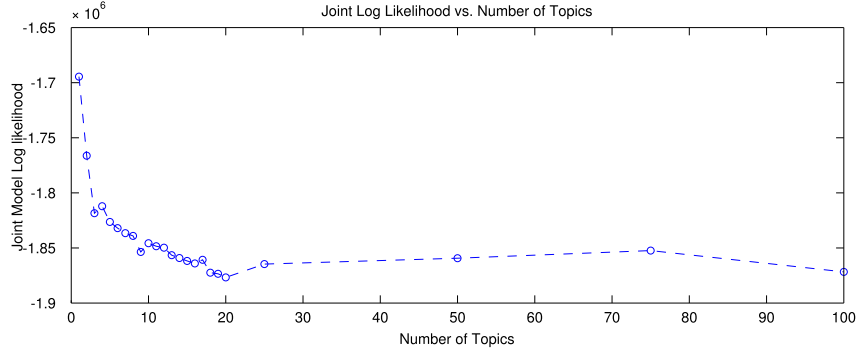

Figure 1: Joint posterior model log likelihood plotted against number of topics for the Associated Press dataset.

## 2 Joint Model Likelihoods

When the desired topic distributions have a lot of overlap, the resulting likelihood of a sample from the typical set under the posterior is typically much smaller than the mode of the distribution. To illustrate this observation, we consider the Associated Press dataset of [2]. We initialize an HDP sample with  $K$  initial topics, and do not allow the addition of new topics. The resulting joint posterior log likelihood for the entire model is shown in Figure 1. Clearly, the joint likelihood is highest for one giant topic. However, we do not expect a sample from the posterior to only contain one topic. In other words, this means the configuration with a single topic is not in the typical set of the posterior, even though it has high likelihood.

For this reason, a deterministic split proposal that has  $\frac{q(z|\hat{v}, \hat{v})}{q(\hat{z}|v, \bar{v})}$  close to unity will almost always reject the sample, since the model likelihood decreases. This is slightly abnormal since, in general, proposals for a split will have the ratio,  $\frac{q(z|\hat{v}, \hat{v})}{q(\hat{z}|v, \bar{v})}$ , evaluate to much less than unity due to the fact that there is only one way to merge two clusters, but many ways to split a cluster into two. As such, the deterministic split proposals described in [3] do not work well in HDPs, and led us to develop the other local and global split/merge proposals.

## 3 Hastings Ratios for Local Proposals

For the proposed local split of topic  $a$ , the only variables that are changed are  $\beta_a$  and  $z_{ji}$  for all points with label  $a$ . Thus, the ratio of posteriors for the local split can be expressed as

$$\frac{p(\hat{\beta}, \hat{z}, x)}{p(\beta, z, x)} = \frac{\gamma \beta_a}{\hat{\beta}_b \hat{\beta}_c} \left[ \prod_{j=1}^D \frac{\Gamma(\alpha \beta_a)}{\Gamma(\alpha \beta_a + n_{j \cdot a})} \prod_{k \in \{b, c\}} \frac{\Gamma(\alpha \hat{\beta}_k + \hat{n}_{j \cdot k})}{\Gamma(\alpha \hat{\beta}_k)} \right] \frac{p(x|\hat{z})}{p(x|z)} \quad (18)$$

Consider the proposal over the main variables  $\hat{\beta}$  and  $\hat{z}$ . A split move is proposed as follows. Conditioned on  $\beta$  and  $z$ , we propose a new  $\hat{\beta}$  and  $\hat{z}$  with the following:

$$\hat{z} \sim q(\hat{z}|v, \bar{v}) \quad (19)$$

$$(\tilde{\beta}_b, \tilde{\beta}_c) \sim \text{Dir}(\hat{m}_{\cdot b}(\hat{z}), \hat{m}_{\cdot c}(\hat{z})) \quad (20)$$

$$(\hat{\beta}_b, \hat{\beta}_c) = \beta_a \cdot (\tilde{\beta}_b, \tilde{\beta}_c), \quad (21)$$

where  $q(\hat{z}|v, \bar{v})$  is described in the main paper. We are a little more careful with notation here, and denote  $\hat{m}$  as the proposed temporary variables. Here, we considering calculating the proposal ratio for the  $\beta$ 's. We use the reversible jump algorithm [4] to calculate the ratio. The function  $f$  maps us from

$$[\beta_a, \bar{\beta}_{al}] \rightarrow [\hat{\beta}_b, \hat{\beta}_c] \quad (22)$$

The Jacobian matrix for the mapping is then

$$J_\beta = \begin{bmatrix} \frac{\partial \hat{\beta}_b}{\partial \beta_a} & \frac{\partial \hat{\beta}_b}{\partial \bar{\beta}_{a\ell}} \\ \frac{\partial \hat{\beta}_c}{\partial \beta_a} & \frac{\partial \hat{\beta}_c}{\partial \bar{\beta}_{a\ell}} \end{bmatrix} = \begin{bmatrix} \bar{\beta}_{a\ell} & \beta_a \\ (1 - \bar{\beta}_{a\ell}) & -\beta_a \end{bmatrix}, \quad (23)$$

which has an absolute value determinant of

$$|\det(J_\beta)| = |\beta_a \cdot \bar{\beta}_{a\ell} - \beta_a(1 - \bar{\beta}_{a\ell})| = \beta_a. \quad (24)$$

The ratio of proposals is then just  $\beta_a$  for a split proposal can then be expressed as:

$$\frac{q(\beta|z, \hat{v}, \bar{v})}{q(\hat{\beta}|\hat{z}, v, \bar{v})} = \frac{\beta_a}{\text{Dir}(\hat{\beta}_b/\beta_a, \hat{\beta}_c/\beta_a; \hat{m}_b, \hat{m}_c)} \quad (25)$$

$$= \beta_a \frac{\Gamma(\hat{m}_b)\Gamma(\hat{m}_c)}{\Gamma(\hat{m}_b + \hat{m}_c)} \left(\frac{\hat{\beta}_b}{\beta_a}\right)^{1-\hat{m}_b} \left(\frac{\hat{\beta}_c}{\beta_a}\right)^{1-\hat{m}_c} \quad (26)$$

$$= \frac{\Gamma(\hat{m}_b)\Gamma(\hat{m}_c)}{\Gamma(\hat{m}_b + \hat{m}_c)} \frac{\hat{\beta}_b^{1-\hat{m}_b} \hat{\beta}_c^{1-\hat{m}_c}}{\beta_a^{1-\hat{m}_b-\hat{m}_c}} \quad (27)$$

Combining these expressions results in the following Hastings ratio for a local split

$$H_S = \frac{p(\hat{\beta}, \hat{z}, x)}{p(\beta, z, x)} \frac{Q_{K+1}^M}{Q_K^S} \frac{q(\beta|z, \hat{v}, \bar{v})}{q(\hat{\beta}|\hat{z}, v, \bar{v})} \frac{1}{q(\hat{z}|v, \bar{v})} \quad (28)$$

$$= \frac{\gamma \beta_a}{\hat{\beta}_b \hat{\beta}_c} \left[ \prod_{j=1}^D \frac{\Gamma(\alpha \beta_a)}{\Gamma(\alpha \beta_a + n_{j \cdot a})} \prod_{k \in \{b, c\}} \frac{\Gamma(\alpha \hat{\beta}_k + \hat{n}_{j \cdot k})}{\Gamma(\alpha \hat{\beta}_k)} \right] \frac{p(x|\hat{z})}{p(x|z)} \\ \times \frac{Q_{K+1}^M}{Q_K^S} \frac{\Gamma(\hat{m}_b)\Gamma(\hat{m}_c)}{\Gamma(\hat{m}_b + \hat{m}_c)} \frac{\hat{\beta}_b^{1-\hat{m}_b} \hat{\beta}_c^{1-\hat{m}_c}}{\beta_a^{1-\hat{m}_b-\hat{m}_c}} \frac{1}{q(\hat{z}|v, \bar{v})} \quad (29)$$

$$= \frac{\gamma \Gamma(\hat{m}_b)\Gamma(\hat{m}_c)}{\Gamma(\hat{m}_b + \hat{m}_c)} \frac{\beta_a^{\hat{m}_b-\hat{m}_c}}{\hat{\beta}_b^{\hat{m}_b} \hat{\beta}_c^{\hat{m}_c}} \frac{p(x|\hat{z})}{p(x|z)} \frac{1}{q(\hat{z}|v, \bar{v})} \frac{Q_{K+1}^M}{Q_K^S} \prod_{j=1}^D \frac{\Gamma(\alpha \beta_a)}{\Gamma(\alpha \beta_a + n_{j \cdot a})} \prod_{k \in \{b, c\}} \frac{\Gamma(\alpha \hat{\beta}_k + \hat{n}_{j \cdot k})}{\Gamma(\alpha \hat{\beta}_k)}, \quad (30)$$

which matches Equation 19 in the main paper. Similarly, it can be shown that the Hastings ratio for a local merge is

$$H_M = \frac{\Gamma(\tilde{m}_b + \tilde{m}_c)}{\gamma \Gamma(\tilde{m}_b)\Gamma(\tilde{m}_c)} \frac{\beta_b^{\tilde{m}_b} \beta_c^{\tilde{m}_c}}{\hat{\beta}_a^{\tilde{m}_b+\tilde{m}_c}} \frac{p(x|z)}{p(x|\hat{z})} q(\hat{z}|v, \bar{v}) \frac{Q_{K-1}^S}{Q_K^M} \prod_{j=1}^D \frac{\Gamma(\alpha \hat{\beta}_a + n_{j \cdot a})}{\Gamma(\alpha \hat{\beta}_a)} \prod_{k \in \{b, c\}} \frac{\Gamma(\alpha \beta_k)}{\Gamma(\alpha \beta_k + \hat{n}_{j \cdot k})}, \quad (31)$$

where  $\tilde{m}$  is a function of the original  $z$ .

## 4 Hastings Ratios for Global Proposals

For the proposed global split of topic  $a$ , all  $\beta$ 's and  $z$ 's change. Instead of denoting the empty  $\beta$  with  $\beta_{K+1}$ , we use the notation  $\beta_E$  here. The ratio of posteriors for the global split can be expressed as

$$\frac{p(\hat{\beta}, \hat{z}, x)}{p(\beta, z, x)} = \left[ \frac{\hat{\beta}_E}{\beta_E} \right]^{\gamma-1} \frac{p(x|\hat{z})}{p(x|z)} \gamma \prod_{k=1}^K \beta_k \prod_{k=1}^{K+1} \hat{\beta}_k^{-1} \prod_{j=1}^D \prod_{k=1}^K \frac{\Gamma(\alpha \beta_k)}{\Gamma(\alpha \beta_k + n_{j \cdot k})} \prod_{k=1}^{K+1} \frac{\Gamma(\alpha \hat{\beta}_k + \hat{n}_{j \cdot k})}{\Gamma(\alpha \hat{\beta}_k)} \quad (32)$$

The proposal ratio for the  $z$ 's is

$$\frac{q(z|\hat{v}, \bar{v})}{q(\hat{z}|v, \bar{v})} q(\tilde{\theta}_a|z) \quad (33)$$

We follow in the same steps as the previous local proposals by calculating the proposal ratio for the  $\beta$ 's.

$$\frac{q(\beta|z)}{q(\hat{\beta}|\hat{z})} = \frac{\text{Dir}(\beta_1, \dots, \beta_K, \beta_E; \tilde{m}_{\cdot 1}, \dots, \tilde{m}_{\cdot K}, \gamma)}{\text{Dir}(\hat{\beta}_1, \dots, \hat{\beta}_{K+1}, \hat{\beta}_E; \hat{m}_{\cdot 1}, \dots, \hat{m}_{\cdot (K+1)}, \gamma)} \quad (34)$$

$$= \frac{\Gamma(\gamma + \tilde{m}_{\cdot})}{\Gamma(\gamma + \hat{m}_{\cdot})} \left( \frac{\beta_E}{\hat{\beta}_E} \right)^{\gamma-1} \prod_{k=1}^K \frac{\beta_k^{\tilde{m}_{\cdot k}-1}}{\Gamma(\tilde{m}_{\cdot k})} \prod_{k=1}^{K+1} \frac{\Gamma(\hat{m}_{\cdot k})}{\hat{\beta}_k^{\hat{m}_{\cdot k}-1}} \quad (35)$$

Combining these expressions, we arrive at the following Hastings ratio for a global split

$$\begin{aligned} H_S &= \frac{p(\hat{\beta}, \hat{z}, x)}{p(\beta, z, x)} \frac{Q_{K+1}^M}{Q_K^S} \frac{q(\beta|z, \hat{v}, \hat{\bar{v}})}{q(\hat{\beta}|\hat{z}, v, \bar{v})} \frac{q(z|\hat{v}, \hat{\bar{v}})}{q(\hat{z}|v, \bar{v})} q(\tilde{\theta}_a|z) \\ &= \left[ \frac{\hat{\beta}_E}{\beta_E} \right]^{\gamma-1} \frac{p(x|\hat{z})}{p(x|z)} \gamma \prod_{k=1}^K \beta_k \prod_{k=1}^{K+1} \hat{\beta}_k^{-1} \prod_{j=1}^D \prod_{k=1}^K \frac{\Gamma(\alpha\beta_k)}{\Gamma(\alpha\beta_k + n_{j\cdot k})} \prod_{k=1}^{K+1} \frac{\Gamma(\alpha\hat{\beta}_k + \hat{n}_{j\cdot k})}{\Gamma(\alpha\hat{\beta}_k)} \\ &\quad \times \frac{Q_{K+1}^M}{Q_K^S} \frac{q(z|\hat{v}, \hat{\bar{v}})}{q(\hat{z}|v, \bar{v})} q(\tilde{\theta}_a|z) \frac{\Gamma(\gamma + \tilde{m}_{\cdot})}{\Gamma(\gamma + \hat{m}_{\cdot})} \left( \frac{\beta_E}{\hat{\beta}_E} \right)^{\gamma-1} \prod_{k=1}^K \frac{\beta_k^{\tilde{m}_{\cdot k}-1}}{\Gamma(\tilde{m}_{\cdot k})} \prod_{k=1}^{K+1} \frac{\Gamma(\hat{m}_{\cdot k})}{\hat{\beta}_k^{\hat{m}_{\cdot k}-1}} \\ &= \frac{\gamma \Gamma(\gamma + \tilde{m}_{\cdot})}{\Gamma(\gamma + \hat{m}_{\cdot})} \frac{p(x|\hat{z})}{p(x|z)} \frac{q(z|\hat{v}, \hat{\bar{v}})}{q(\hat{z}|v, \bar{v})} \frac{q(\tilde{\theta}_a|x, z)}{1} \frac{Q_{K+1}^M}{Q_K^S} \\ &\quad \times \prod_{k=1}^K \frac{\beta_k^{\tilde{m}_{\cdot k}}}{\Gamma(\tilde{m}_{\cdot k})} \prod_{j=1}^D \frac{\Gamma(\alpha\beta_k)}{\Gamma(\alpha\beta_k + n_{j\cdot k})} \times \prod_{k=1}^{K+1} \frac{\Gamma(\hat{m}_{\cdot k})}{\hat{\beta}_k^{\hat{m}_{\cdot k}}} \prod_{j=1}^D \frac{\Gamma(\alpha\hat{\beta}_k + \hat{n}_{j\cdot k})}{\Gamma(\alpha\hat{\beta}_k)}, \end{aligned} \quad (36)$$

which matches Equation 24 in the main paper. Similarly, it can be shown that the Hastings ratio for a global merge is

$$\begin{aligned} H_M &= \frac{\Gamma(\gamma + \tilde{m}_{\cdot})}{\gamma \Gamma(\gamma + \hat{m}_{\cdot})} \frac{p(x|\hat{z})}{p(x|z)} \frac{q(z|\hat{v}, \hat{\bar{v}})}{q(\hat{z}|v, \bar{v})} \frac{1}{q(\tilde{\theta}_c|x, \hat{z})} \frac{Q_{K-1}^S}{Q_K^M} \\ &\quad \times \prod_{k=1}^K \frac{\beta_k^{\tilde{m}_{\cdot k}(z)}}{\Gamma(\tilde{m}_{\cdot k}(z))} \prod_{j=1}^D \frac{\Gamma(\alpha\beta_k)}{\Gamma(\alpha\beta_k + n_{j\cdot k})} \times \prod_{k=1}^{K-1} \frac{\Gamma(\hat{m}_{\cdot k})}{\hat{\beta}_k^{\hat{m}_{\cdot k}}} \prod_{j=1}^D \frac{\Gamma(\alpha\hat{\beta}_k + \hat{n}_{j\cdot k})}{\Gamma(\alpha\hat{\beta}_k)}, \end{aligned} \quad (37)$$

## 5 Topic Visualization

The word clouds at the end of this document summarize the inferred topics for a single sample path in the dataset of New York Times Articles. The topics are ordered in decreasing values of  $\beta$ , with highest likely topics appearing first.

## References

- [1] Y. W. Teh, M. I. Jordan, M. J. Beal, and D. M. Blei. Hierarchical Dirichlet processes. *Journal of the American Statistical Association*, 101(476):1566–1581, 2006.
- [2] D. M. Blei, A. Y. Ng, and M. I. Jordan. Latent Dirichlet allocation. *Journal of Machine Learning Research*, 3:993–1022, March 2003.
- [3] J. Chang and J. W. Fisher, III. Parallel sampling of DP mixture models using sub-clusters splits. In *Advances in Neural Information and Processing Systems*, Dec 2013.
- [4] P. J. Green. Reversible jump Markov chain Monte Carlo computation and Bayesian model determination. *Biometrika*, 82:711–732, 1995.

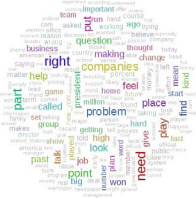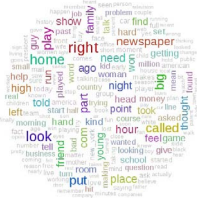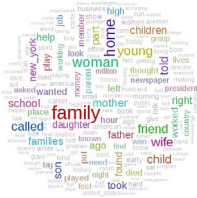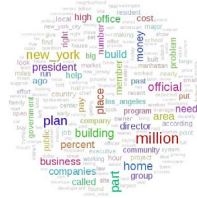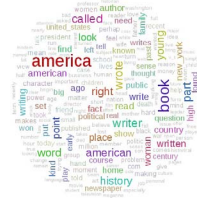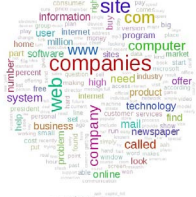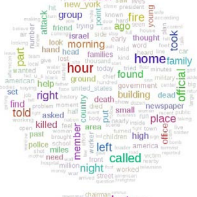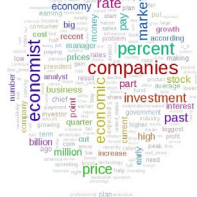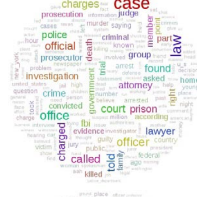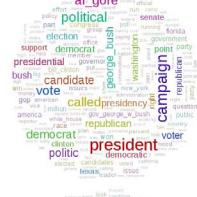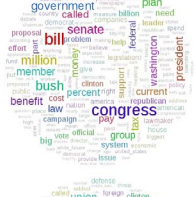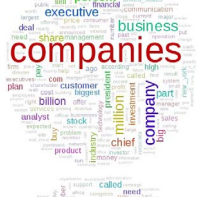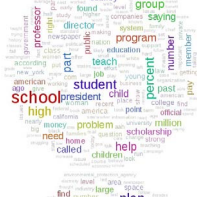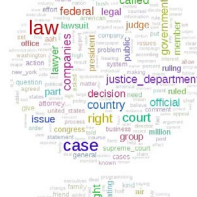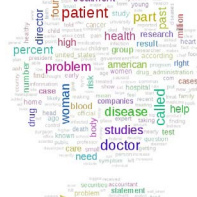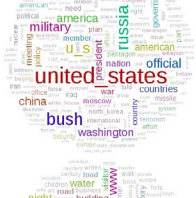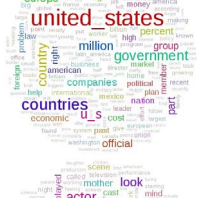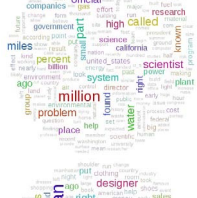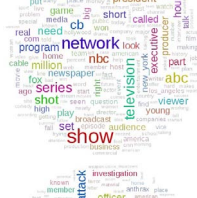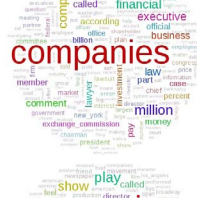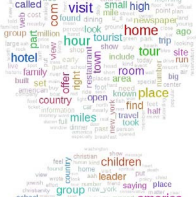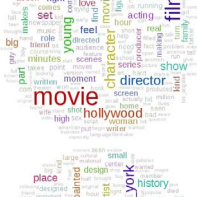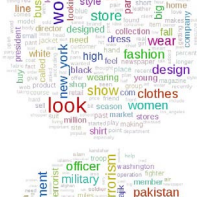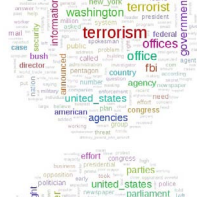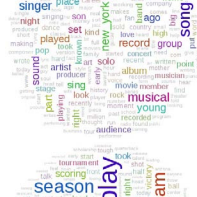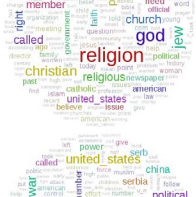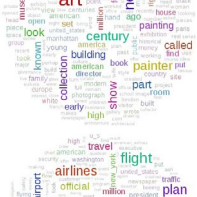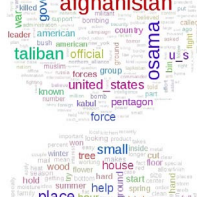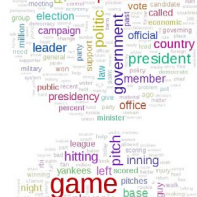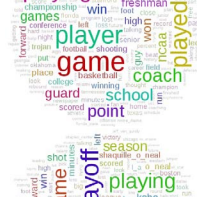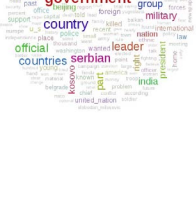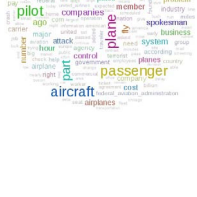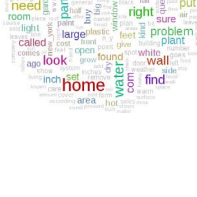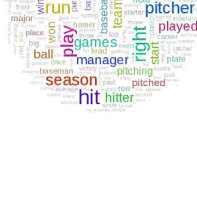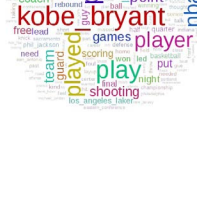

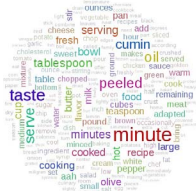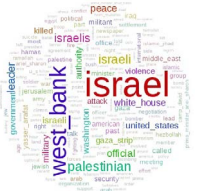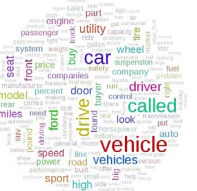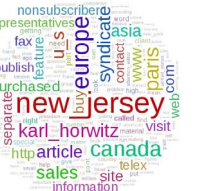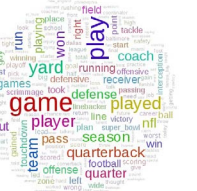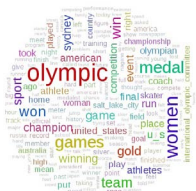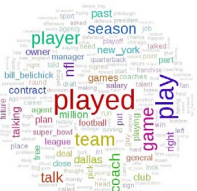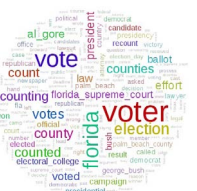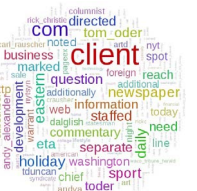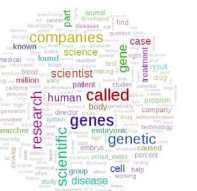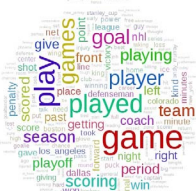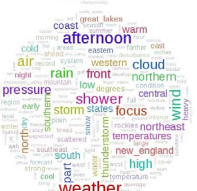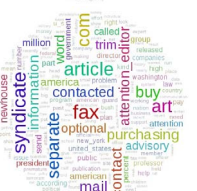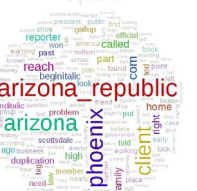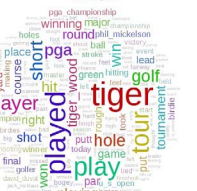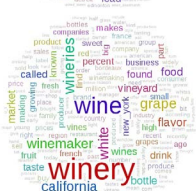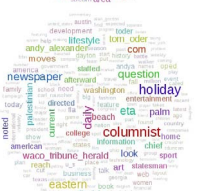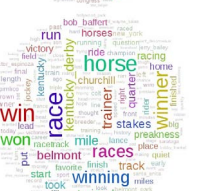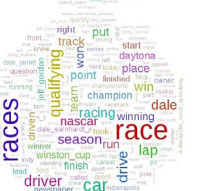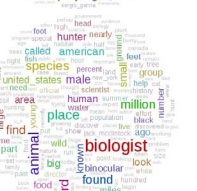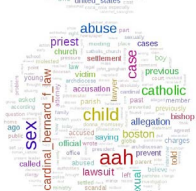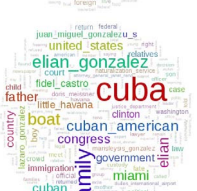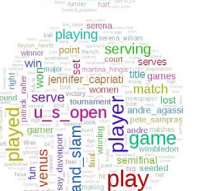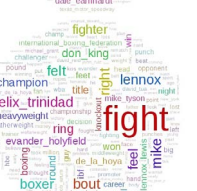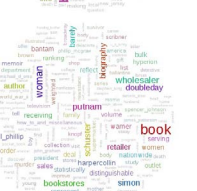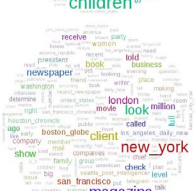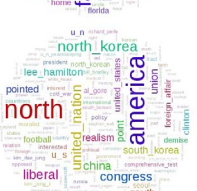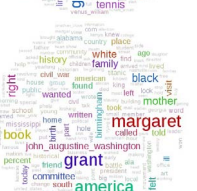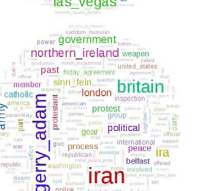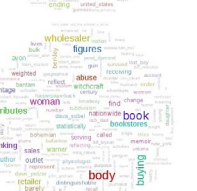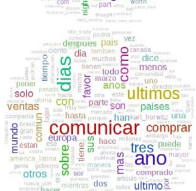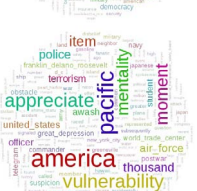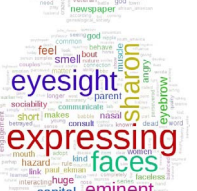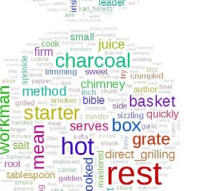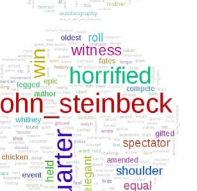



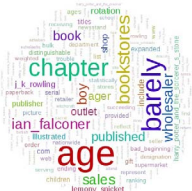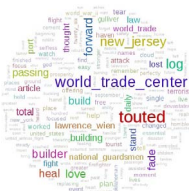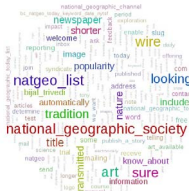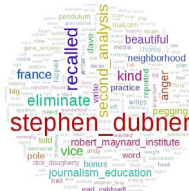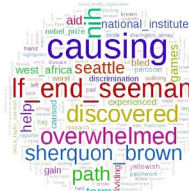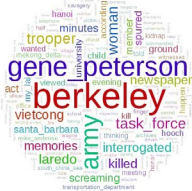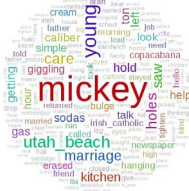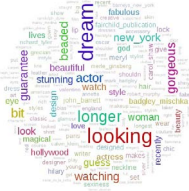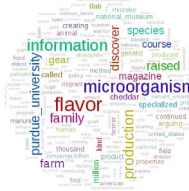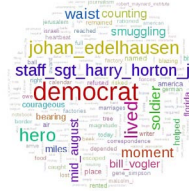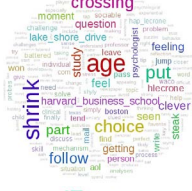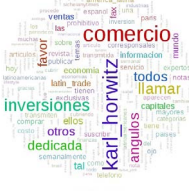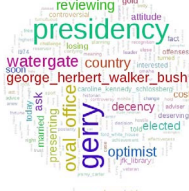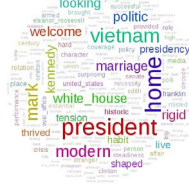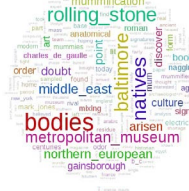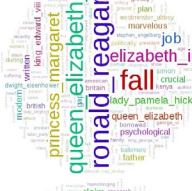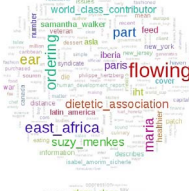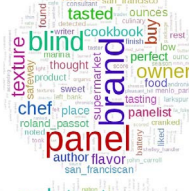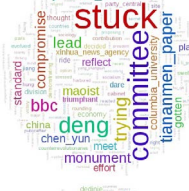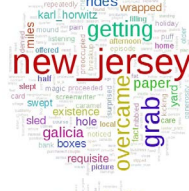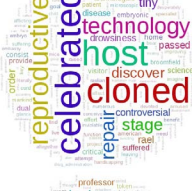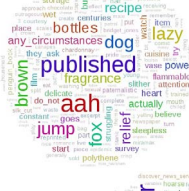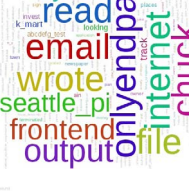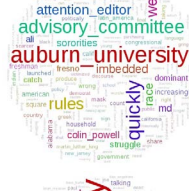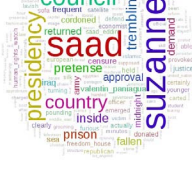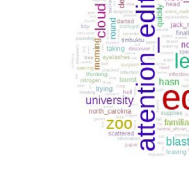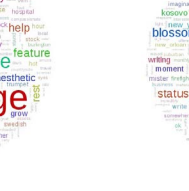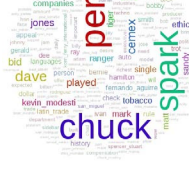

Supplement: Supplementary file [file 149e9677a5989fd342ae44213df68868-Supplemental.zip]
